# Supplementary material for: RNA-mediated ribonucleoprotein assembly controls TDP-43 nuclear retention
Source: PubMed Central journal article supplement (PMC10931518; doi:10.1371/journal.pbio.3002527), 2024-02-29

1B\_raw\_images

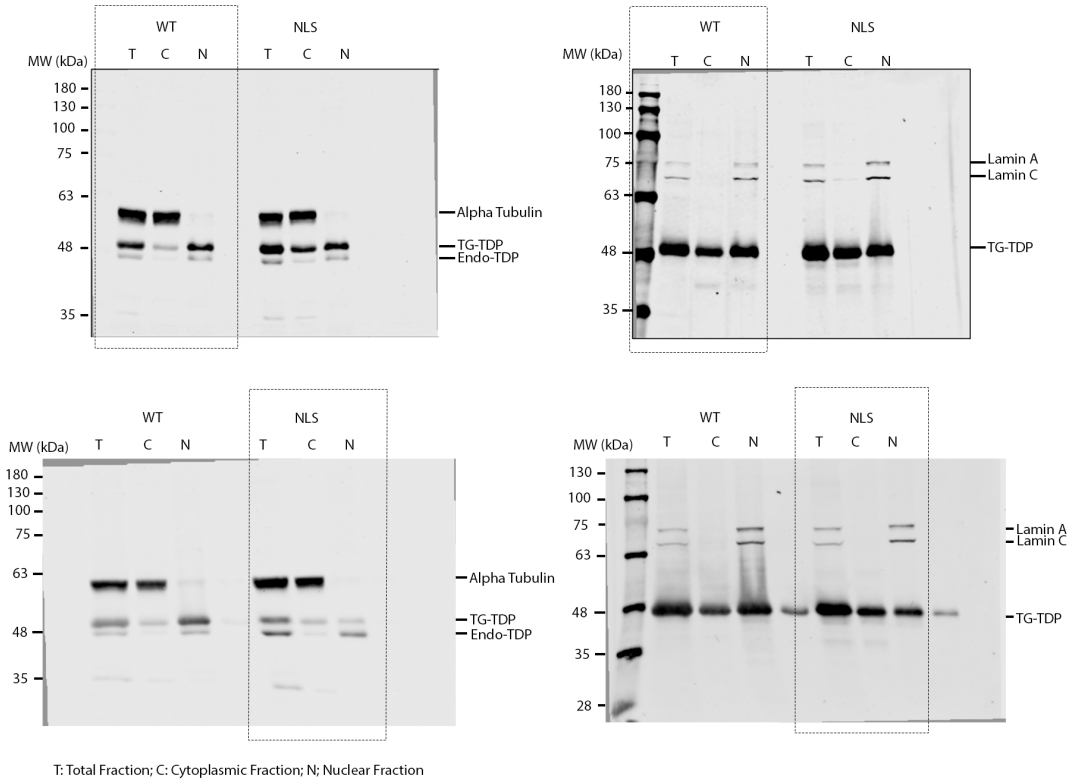

5A\_raw\_images

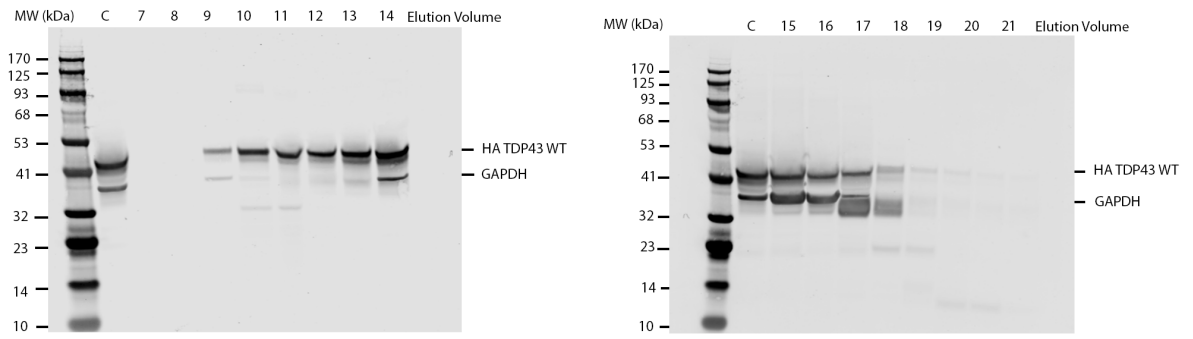

MW: Molecular weight marker; C: Control Sample used to normalize the band intensities of two different membranes

S1B\_raw\_images

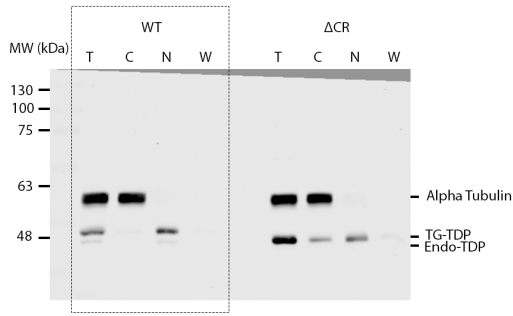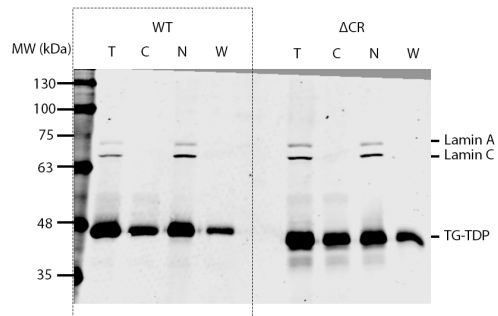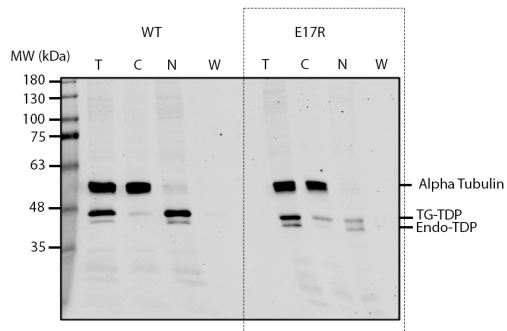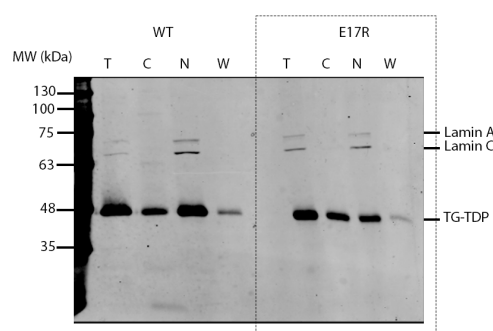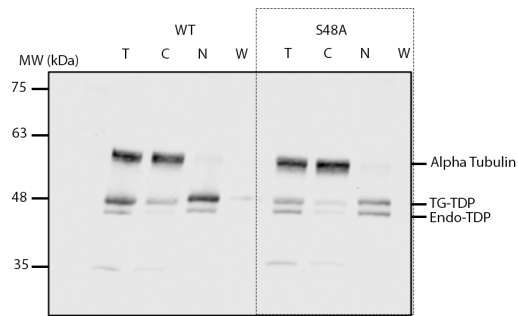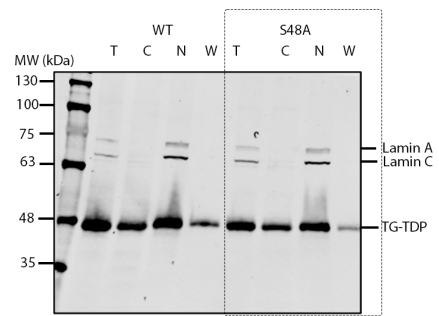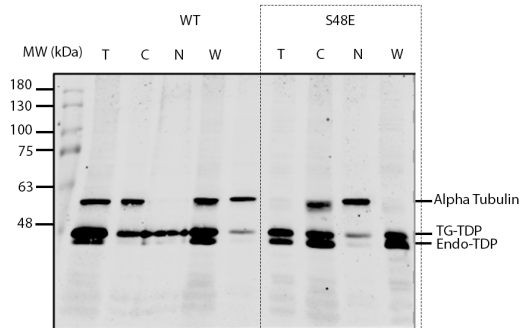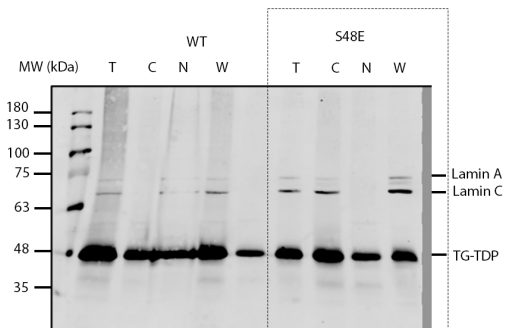

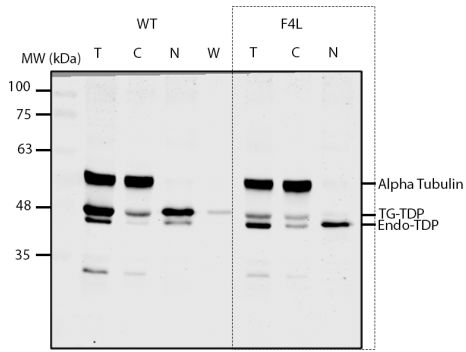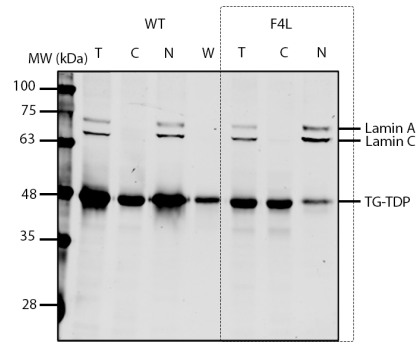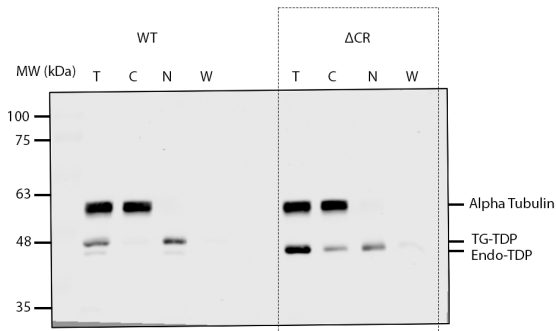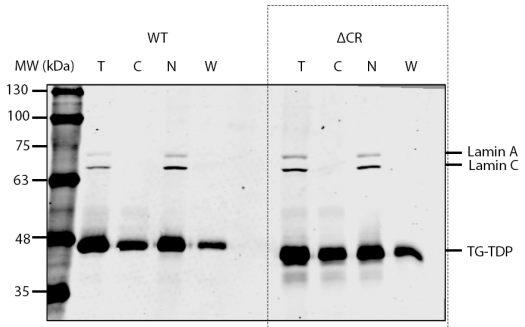

T: Total Fraction; C: Cytoplasmic Fraction; N: Nuclear Fraction; W: Washed Fraction

## S2A\_raw\_images

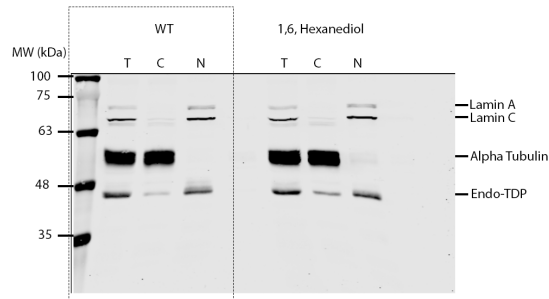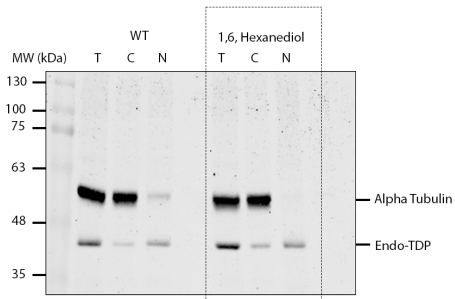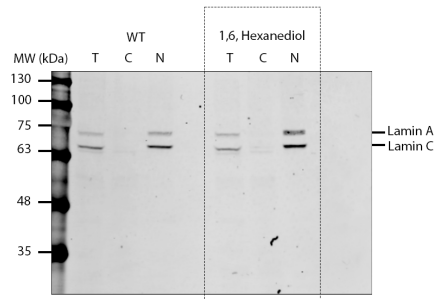

T: Total Fraction; C: Cytoplasmic Fraction; N: Nuclear Fraction

## S2B\_raw\_images

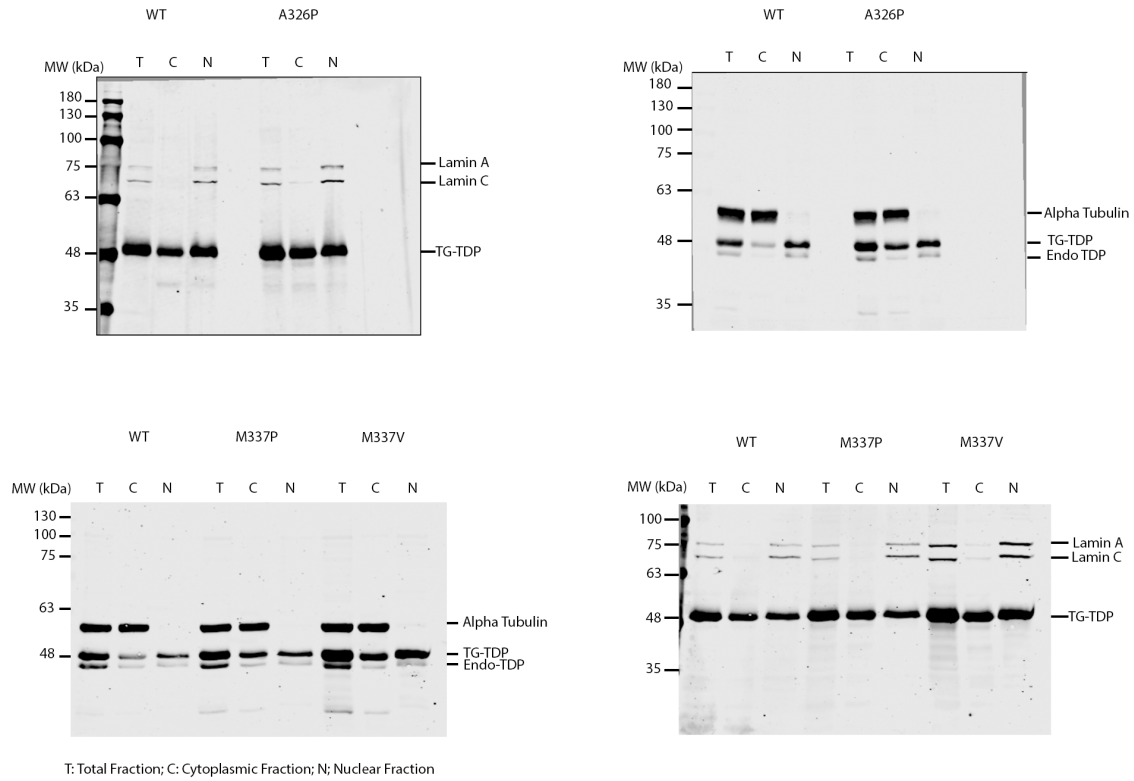

## S3\_raw\_images

### WT

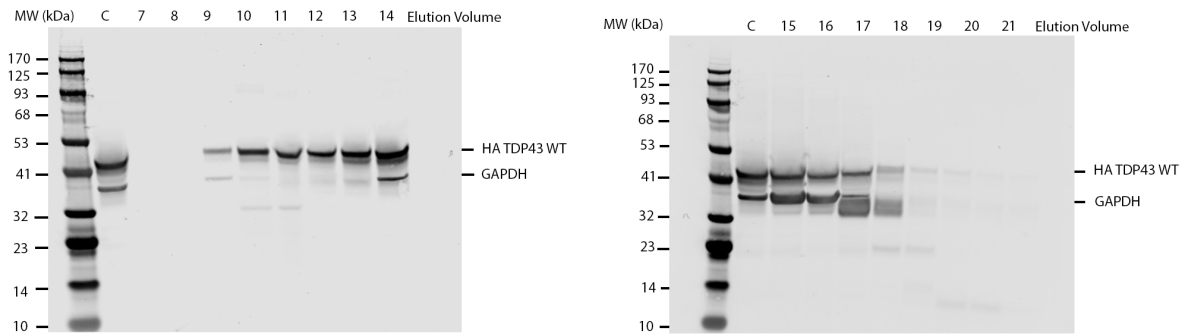

MW: Molecular weight marker; C: Control Sample used to normalize the band intensities of two different membranes

## E17R

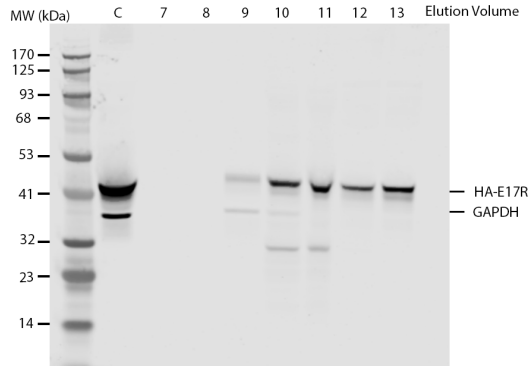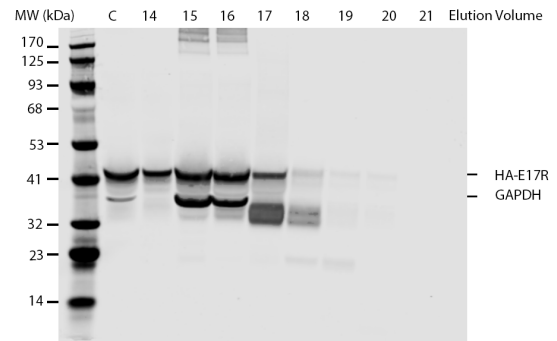

## F4L

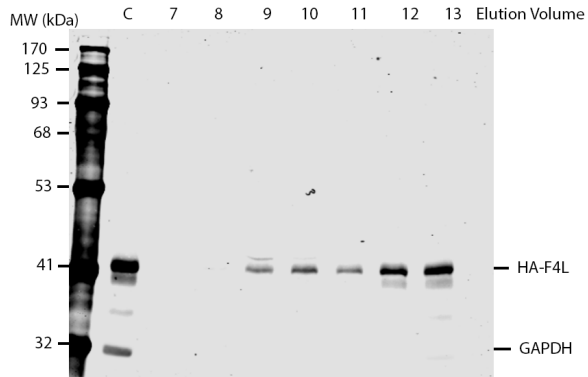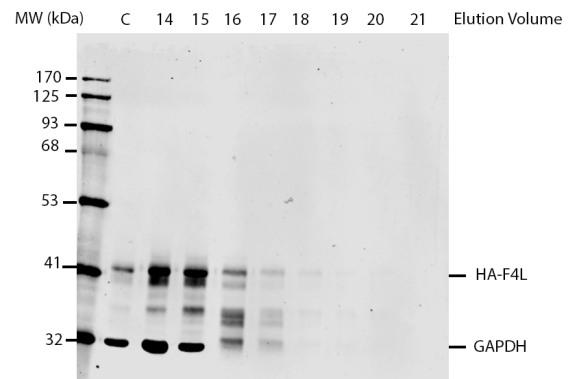

## $\Delta$ CR

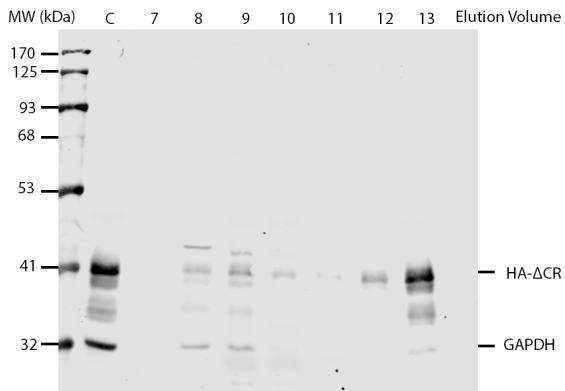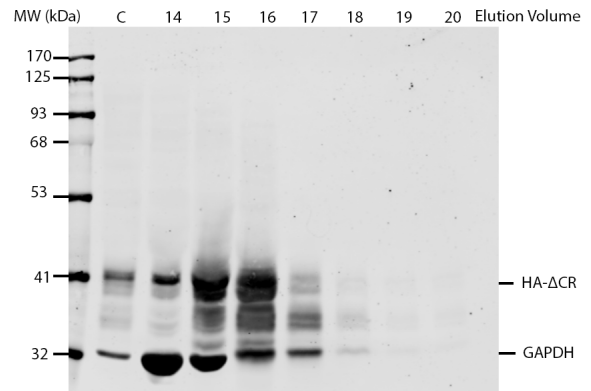

# A326P

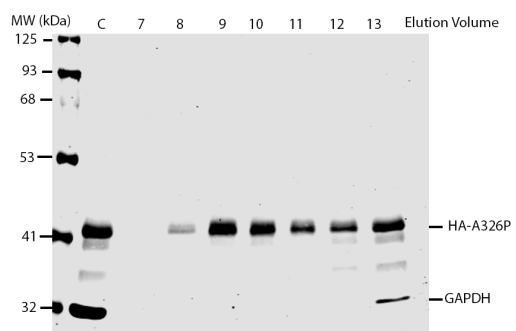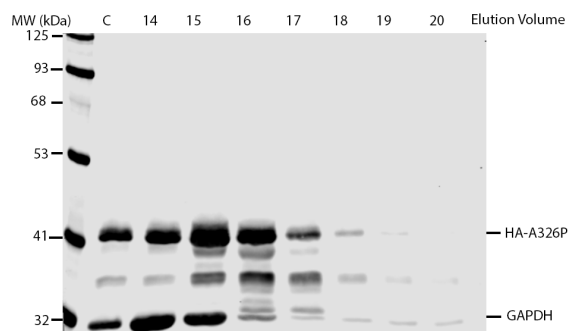

Supplement: pbio.3002527.s007.pdf [file pbio.3002527.s007.pdf]
