# Supplementary material for: RNA-mediated ribonucleoprotein assembly controls TDP-43 nuclear retention
Source: PubMed Central journal article supplement (PMC10931518; doi:10.1371/journal.pbio.3002527), 2024-02-29
Supplement: pbio.3002527.s003.pdf [file pbio.3002527.s003.pdf]

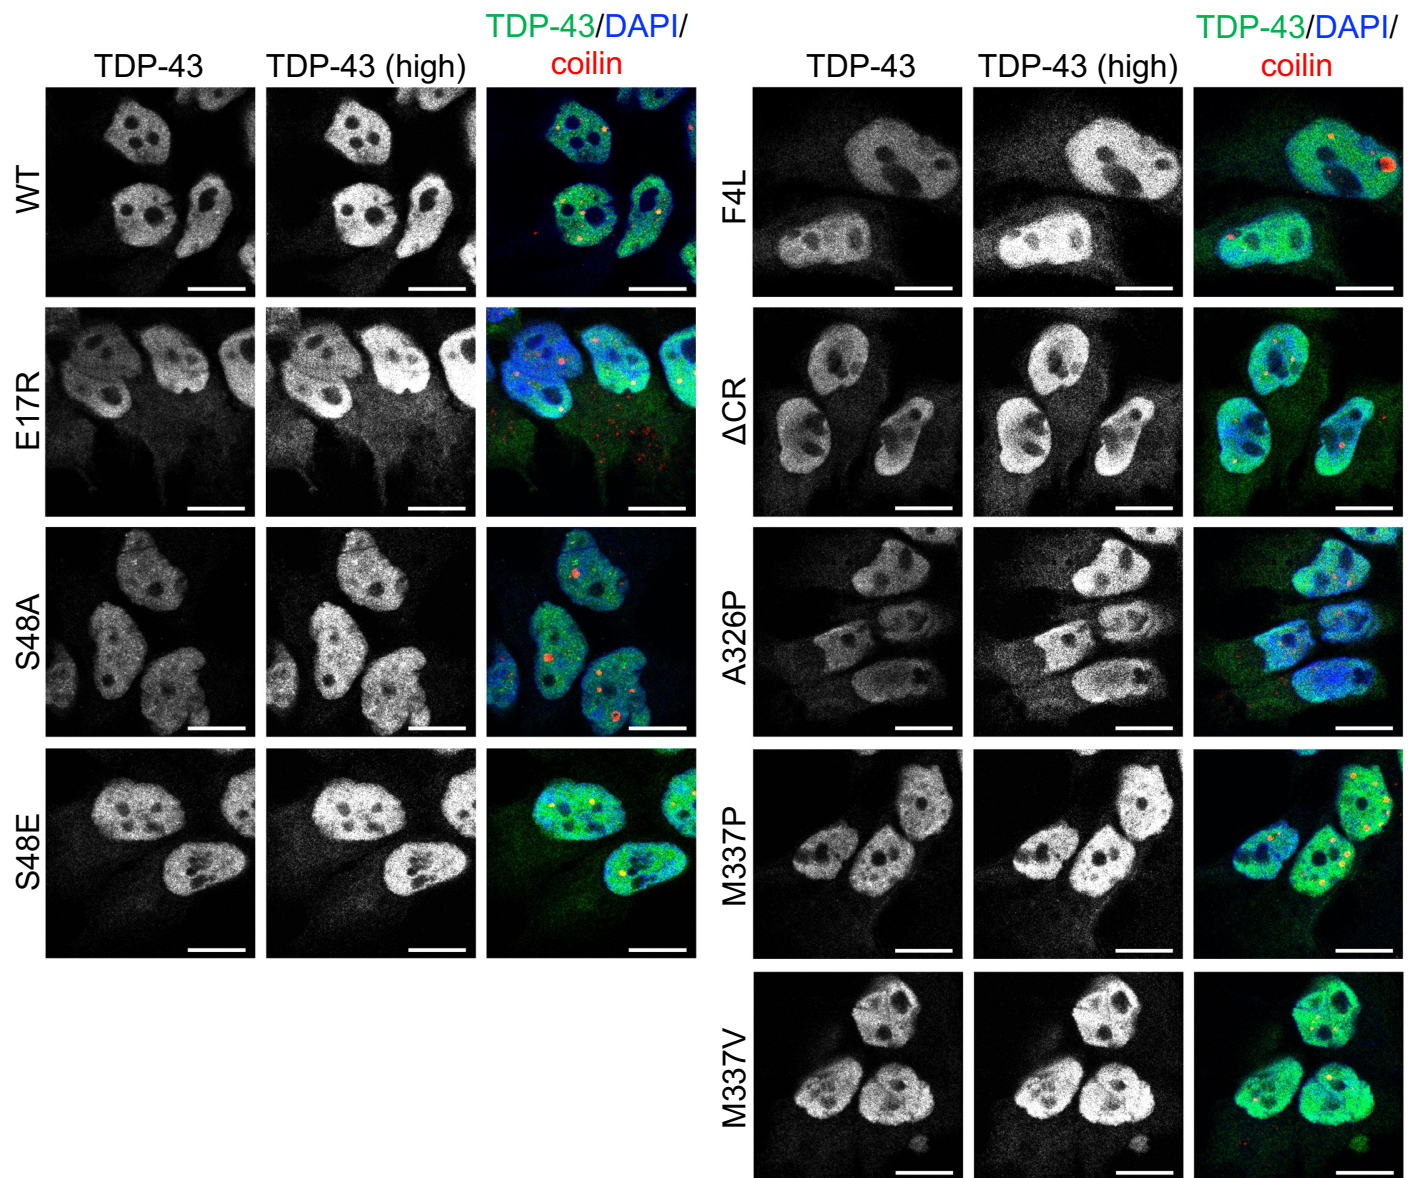

**Supporting Figure 3. Cellular distribution of WT and mutant TDP-43 as seen by microscopy.** Immunofluorescence of HEK293<sup>HA-TDP-43</sup> cells expressing HA-tagged WT and indicated mutant TDP-43 after 48 h of Tet induction, as seen by confocal microscopy. The Cajal body marker coilin and HA antibodies were used for detection. Scale, 10  $\mu$ m.
