# Supplementary material for: RNA-mediated ribonucleoprotein assembly controls TDP-43 nuclear retention
Source: PubMed Central journal article supplement (PMC10931518; doi:10.1371/journal.pbio.3002527), 2024-02-29
Supplement: pbio.3002527.s004.pdf [file pbio.3002527.s004.pdf]

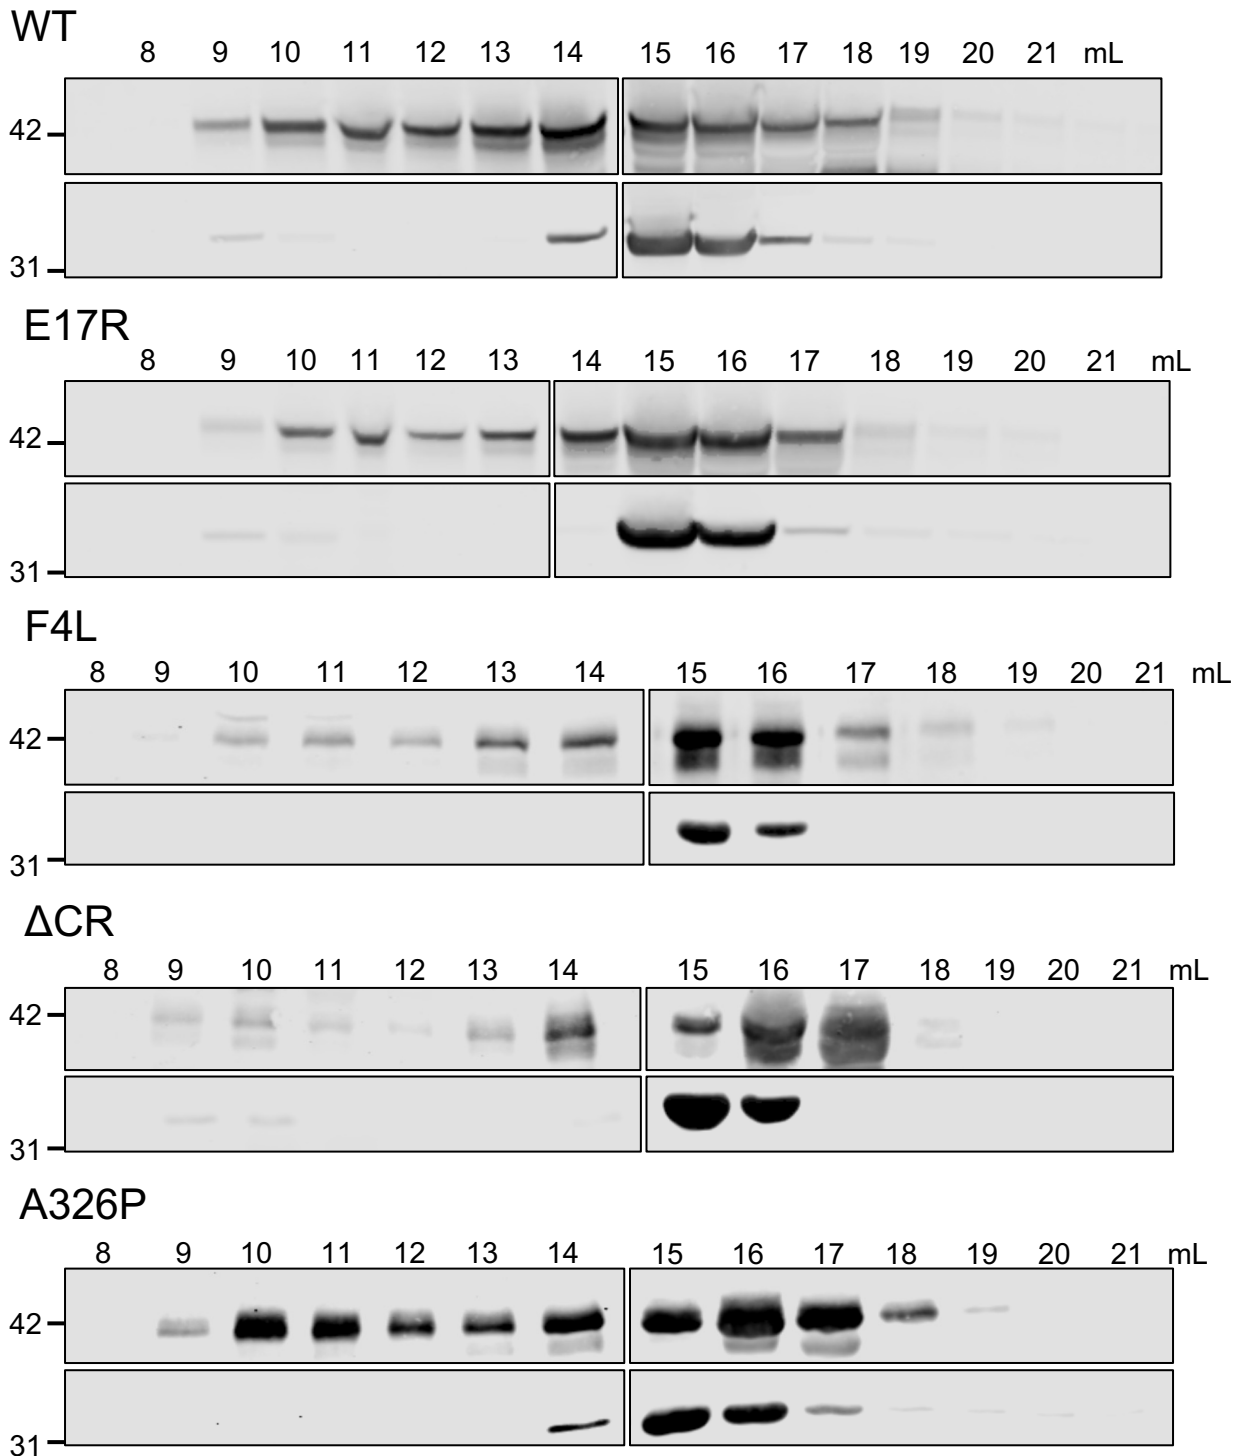

**Supporting Figure 4. TDP-43 macromolecular complex distribution in total cell lysate.**

Immunoblot detecting HA-TDP-43 levels in fractions eluted from gel filtration size exclusion chromatography of HEK293<sup>HA-TDP-43</sup> cell lysate. Membranes were probed with HA antibody and GAPDH as control. Source images can be found in S1 Raw Images.
