# Supplementary material for: RNA-mediated ribonucleoprotein assembly controls TDP-43 nuclear retention
Source: PubMed Central journal article supplement (PMC10931518; doi:10.1371/journal.pbio.3002527), 2024-02-29
Supplement: pbio.3002527.s005.pdf [file pbio.3002527.s005.pdf]

**Supporting Table 1. Oligonucleotides used in these studies**

| DNA                       | Sequence                                                                                       |
|---------------------------|------------------------------------------------------------------------------------------------|
| TDP43_A326P Fw            | 5'-<br>CCAGCCATGATGGCTGCCCCACAGGCAGCACTACAGA<br>GCAGTTGG-3'                                    |
| TDP43_A326P Rv            | 5'-<br>CCAAGTCTCTGTAGTGCTGCCTGTGGGGCAGCCATC<br>ATGGCTGG-3'                                     |
| TDP43_M337P Fw            | 5'-<br>CAGAGCAGTTGGGGTATGCCAGGCATGTTAGCCAGCC<br>AG -3'                                         |
| TDP43_M337P Rv            | 5'-<br>CTGGCTGGCTAACATGCCTGGCATAACCCCAACTGCTCT<br>G-3'                                         |
| RNA                       | RNA sequence (r) with modifications:<br>m: 2' O-methyl; *: phosphorothioate; /3Bio/: 3'-biotin |
| (CA) <sub>6</sub> -biotin | mC*mA*mC*mA*mC*mA*mC*mA*mC*mA*mC*rA /3Bio/                                                     |
| (GU) <sub>6</sub> -biotin | mG*mU*mG*mU*mG*mU*mG*mU*mG*mU*mG*rU /3Bio/                                                     |
